# Supplementary material for: The role of tailored climate scenario information for theperceived legitimacy of climate policy paths
Source: Research Square preprint supplement (doi:10.21203/rs.3.rs-3691918/v1), 2024-01-05
Supplement: Supplementary file 1 [file 10de2c2ae5b11fb65c81ff6b.xlsx]

## Sheet: Claims | Attitude
Claim 1		Count of responses					Count of responses						Claim 2		Count of responses											Claim 3		Count of responses											Claim 4		Count of responses
There is scientific background for the need to mitigate climate change		Before obtaining tailored information					After obtaining tailored information						I know how climate change will affect me and my living environment by year 2040, if emissions continue increasing		Before obtaining tailored information					After obtaining tailored information						It is justified to advance climate action, i.e. emission reductions, in Finland		Before obtaining tailored information					After obtaining tailored information						Finland's goal to be carbon neutral by year 2035 is justified		Before obtaining tailored information					After obtaining tailored information
Subgroup		no opinion	fully disagree	partly agree	partly disagree	fully agree	no opinion	fully disagree	partly agree	partly disagree	fully agree		Subgroup		no opinion	fully disagree	partly agree	partly disagree	fully agree	no opinion	fully disagree	partly agree	partly disagree	fully agree		Subgroup		no opinion	fully disagree	partly disagree	partly agree	fully agree	no opinion	fully disagree	partly disagree	partly agree	fully agree		Subgroup		no opinion	fully disagree	partly disagree	partly agree	fully agree	no opinion	fully disagree	partly disagree	partly agree
Gender	male	21	23	40	162	257	25	24	39	170	246		Gender	male	24	26	94	248	112	32	16	64	247	142		Gender	male	27	39	56	173	209	22	40	52	159	230		Gender	male	49	92	102	137	123	39	77	101	145
	female	25	22	29	141	287	27	25	29	141	280			female	31	26	76	276	95	32	8	42	250	170			female	25	28	34	147	271	28	22	41	134	273			female	48	70	72	179	131	45	57	74	172
	other		1			4		2			3			other		1	1	2	1			1	3	1			other		1			4		1			4			other		1	2		2		2		2
	no response					1					1			no response				1		1							no response				1		1							no response	1					1
Birth year	1940-1949	2	1	3	22	30	1	1	3	20	33		Birth year	1940-1949	5	1	7	26	19	6		5	28	19		Birth year	1940-1949	3	2	3	17	33	4	1	3	14	36		Birth year	1940-1949	8	5	10	12	20	5	3	10	14
	1950-1959	7	10	8	42	119	3	10	6	55	112			1950-1959	11	4	21	107	43	15	2	10	99	60			1950-1959	7	13	15	48	103	6	10	14	49	105			1950-1959	11	31	25	61	57	8	28	28	54
	1960-1969	4	7	6	50	111	5	9	6	48	110			1960-1969	8	13	26	95	37	9	6	13	92	58			1960-1969	2	9	15	51	101	6	11	12	49	101			1960-1969	17	23	31	51	56	18	26	27	50
	1970-1979	8	4	8	47	96	11	6	12	44	91			1970-1979	11	8	31	87	27	9	2	21	87	45			1970-1979	9	8	16	55	77	9	6	16	51	81			1970-1979	19	22	37	49	38	20	20	26	56
	1980-1989	8	8	13	42	73	14	9	14	45	61			1980-1989	7	12	30	70	25	10	7	16	77	31			1980-1989	9	17	12	46	60	8	17	14	44	58			1980-1989	16	35	24	42	25	12	32	22	43
	1990-1999	6	6	15	58	76	9	8	16	53	74			1990-1999	8	5	29	86	33	10	2	26	66	55			1990-1999	13	8	17	61	62	10	10	18	50	72			1990-1999	15	22	34	55	35	11	12	33	59
	2000-2009	11	10	16	42	44	9	8	11	46	49			2000-2009	5	10	27	56	24	6	5	16	51	45			2000-2009	9	11	12	43	48	8	8	16	36	54			2000-2009	12	25	15	46	25	11	15	29	43
Education	Comprehensive school	14	4	13	36	48	15	5	10	34	51		Education	Comprehensive school	8	7	21	54	25	14	5	8	55	32		Education	Comprehensive school	9	9	10	41	46	12	9	8	31	54		Education	Comprehensive school	10	25	16	40	24	13	12	20	37
	High school	22	19	36	164	246	24	24	33	176	229			High school	33	26	92	239	97	33	8	56	246	142			High school	31	35	50	155	217	19	33	47	157	227			High school	55	82	98	144	107	43	72	88	165
	University	10	21	18	100	241	13	20	24	95	238			University	14	20	53	223	81	17	8	41	190	133			University	12	22	29	119	209	18	18	37	100	216			University	33	55	59	126	114	28	51	63	114
	Doctoral degree		2	2	3	14		2	1	6	12			Doctoral degree			5	11	5	1	3	2	9	6			Doctoral degree		2	1	6	12	2	3	1	5	10			Doctoral degree		1	3	6	11	1	1	4	3
Yearly income	> 100 000 €		2		9	7	1	1	2	8	6		Yearly income	> 100 000 €		2	4	7	5	2	1	2	10	3		Yearly income	> 100 000 €	2	1	2	7	6	2		3	5	7		Yearly income	> 100 000 €	3	3	1	6	5	2		6	4
	70–100 000 €	1	6		12	21	2	3	5	10	20			70–100 000 €	4	2	9	16	9	3		7	12	17			70–100 000 €	3	3	3	8	23	2	2	5	8	23			70–100 000 €	6	3	8	14	8	5	3	6	13
	50–70 000 €	2	4	5	21	49	3	5	4	21	47			50–70 000 €	3	2	9	51	17	3	2	6	42	29			50–70 000 €	4	9	4	30	35	2	7	4	30	38			50–70 000 €	6	12	21	21	22	6	13	18	19
	40–50 000 €	5	4	12	31	46	3	8	8	34	44			40–50 000 €	5	3	23	52	15	5	3	13	48	26			40–50 000 €	6	7	12	26	46	3	9	12	28	45			40–50 000 €	12	21	16	21	27	8	18	20	21
	30–40 000 €	3	6	12	48	99	7	9	8	51	94			30–40 000 €	4	10	26	91	38	8	3	21	86	51			30–40 000 €	8	10	13	61	77	8	7	13	50	90			30–40 000 €	12	28	26	62	41	10	22	26	60
	20–30 000 €	2	4	13	44	99	5	7	13	51	87			20–30 000 €	6	5	28	96	28	11	4	15	77	56			20–30 000 €	8	9	14	51	81	10	9	10	48	86			20–30 000 €	11	18	33	46	53	7	17	28	50
	10–20 000 €	8	7	8	52	93	10	6	9	43	99			10–20 000 €	12	15	24	75	42	10	6	19	83	49			10–20 000 €	2	13	17	48	88	7	12	16	37	94			10–20 000 €	14	30	32	48	43	16	23	26	54
	< 10 000 €	14	1	11	37	51	12	1	10	40	51			< 10 000 €	10	6	23	51	24	8	1	10	59	35			< 10 000 €	11	5	8	33	57	8	5	12	33	54			< 10 000 €	16	18	16	41	23	15	13	20	43
	no response	11	12	8	49	84	9	11	9	53	82			no response	11	8	25	88	30	15	4	14	83	47			no response	8	11	17	57	71	9	12	18	54	70			no response	18	30	23	57	34	16	27	25	55
Domicile type	Urban	35	39	52	257	471	43	45	56	256	453		Domicile type	Urban	43	43	142	452	174	53	19	91	430	258		Domicile type	Urban	46	54	75	269	410	44	51	80	240	433		Domicile type	Urban	90	133	143	267	215	75	112	145	268
	Densely populated municipality	5	5	3	27	42	5	2	4	23	48			Densely populated municipality	6	5	18	41	13	7	2	5	42	26			Densely populated municipality	1	7	6	27	43	2	5	6	27	42			Densely populated municipality	6	13	19	25	21	5	9	17	29
	Rural	6	2	14	19	36	4	4	8	32	29			Rural	6	5	11	34	21	5	3	11	28	29			Rural	5	7	9	25	31	5	7	7	26	32			Rural	2	17	14	24	20	5	15	13	22
[truncated: 25 more columns]

## Sheet: PD
CLIMATE CHANGE SPATIALLY		Count of classified responses								CLIMATE CHANGE TEMPORALLY		Count of classified responses								CLIMATE CHANGE SOCIALLY		Count of classified responses								TOTAL PD		Count of classified responses
(SPATIAL DIMENSION OF PD)		Before obtaining tailored information				After obtaining tailored information				(TEMPORAL DIMENSION OF PD)		Before obtaining tailored information				After obtaining tailored information				(SOCIAL DIMENSION OF PD)		Before obtaining tailored information				After obtaining tailored information						Before obtaining tailored information				After obtaining tailored information
Subgroup		proximal	hardly distant	fairly distant	very distant	proximal	hardly distant	fairly distant	very distant	Subgroup		proximal	hardly distant	fairly distant	very distant	proximal	hardly distant	fairly distant	very distant	Subgroup		proximal	hardly distant	fairly distant	very distant	proximal	hardly distant	fairly distant	very distant	Subgroup		proximal	hardly distant	fairly distant	very distant	proximal	hardly distant	fairly distant	very distant
Gender	male	211	190	52	17	197	211	48	20	Gender	male	86	125	180	73	87	112	191	77	Gender	male	137	142	121	53	111	143	131	77	Gender	male
	female	228	185	39	15	230	175	41	13		female	109	167	140	47	109	153	143	56		female	172	164	77	34	143	156	118	44		female
	other	3	1		1	3	2				other	4		1		3		1	1		other	4	1			3		1	1		other
	no response	1					1				no response							1			no response		1								no response
Birth year	1940-1949	30	21	2		25	25	3		Birth year	1940-1949	12	18	15	8	8	19	16	7	Birth year	1940-1949	13	15	17	4	14	11	21	4	Birth year	1940-1949
	1950-1959	88	72	8	6	95	67	5	7		1950-1959	54	55	52	12	53	55	60	11		1950-1959	68	54	29	17	61	55	42	15		1950-1959
	1960-1969	90	67	12	3	89	72	6	4		1960-1969	49	52	45	21	53	40	46	27		1960-1969	65	60	23	19	48	55	41	23		1960-1969
	1970-1979	72	64	11	6	67	68	16	3		1970-1979	26	57	47	20	32	40	52	25		1970-1979	51	52	30	14	44	52	36	21		1970-1979
	1980-1989	55	46	22	7	50	49	21	11		1980-1989	16	42	49	24	20	37	48	23		1980-1989	40	39	35	8	28	43	37	18		1980-1989
	1990-1999	62	64	19	5	57	70	16	3		1990-1999	23	39	67	18	19	48	66	20		1990-1999	47	48	35	14	31	50	41	26		1990-1999
	2000-2009	46	42	17	6	47	38	22	5		2000-2009	19	29	46	17	14	26	48	21		2000-2009	29	40	29	11	31	33	32	15		2000-2009
Education	Comprehensive school	41	44	11	5	43	43	8	7	Education	Comprehensive school	17	26	41	17	17	26	37	19	Education	Comprehensive school	25	28	31	11	28	28	27	13	Education	Comprehensive school
	High school	199	188	44	15	190	196	49	17		High school	86	134	163	58	86	123	170	68		High school	138	146	96	43	103	155	120	67		High school
	University	189	139	36	11	187	143	30	8		University	91	126	111	42	91	110	123	44		University	142	128	68	29	118	110	101	38		University
	Doctoral degree	14	5		2	10	7	2	1		Doctoral degree	5	6	6	3	5	6	6	3		Doctoral degree	8	6	3	4	8	6	2	4		Doctoral degree
Yearly income	> 100 000 €	6	10	1	1	7	6	2	1	Yearly income	> 100 000 €	1	4	8	3	1	3	9	4	Yearly income	> 100 000 €	3	5	2	5	3	3	5	4	Yearly income	> 100 000 €
	70–100 000 €	22	9	5	2	17	14	3	2		70–100 000 €	7	15	8	8	8	11	11	6		70–100 000 €	11	9	9	7	13	8	9	8		70–100 000 €
	50–70 000 €	31	35	9	3	32	35	5	4		50–70 000 €	14	24	27	11	14	20	29	13		50–70 000 €	26	26	16	10	15	27	23	14		50–70 000 €
	40–50 000 €	39	33	16	4	37	39	12	4		40–50 000 €	13	28	38	13	14	22	39	13		40–50 000 €	27	27	24	9	19	29	31	11		40–50 000 €
	30–40 000 €	79	64	16	4	82	57	14	5		30–40 000 €	30	55	59	17	34	48	54	23		30–40 000 €	55	59	34	13	51	48	44	16		30–40 000 €
	20–30 000 €	77	64	12	1	74	67	10	2		20–30 000 €	34	48	50	20	32	48	50	25		20–30 000 €	53	48	36	16	45	56	33	21		20–30 000 €
	10–20 000 €	77	60	8	7	79	59	13	5		10–20 000 €	51	38	42	19	48	39	49	21		10–20 000 €	53	46	28	11	46	51	29	23		10–20 000 €
	< 10 000 €	47	41	10	2	43	46	16	2		< 10 000 €	18	33	37	14	20	27	41	14		< 10 000 €	36	31	22	10	26	33	32	13		< 10 000 €
	no response	65	60	14	9	59	66	14	8		no response	31	47	52	15	28	47	54	15		no response	49	57	27	6	39	44	44	12		no response
Domicile type	Urban	379	309	79	29	374	320	71	27	Domicile type	Urban	174	242	274	103	172	223	277	116	Domicile type	Urban	270	258	168	74	227	246	211	101	Domicile type	Urban
	Densely populated municipality	32	39	5	2	31	36	9	2		Densely populated municipality	14	30	25	6	20	22	27	8		Densely populated municipality	27	27	14	5	22	28	16	8		Densely populated municipality
	Rural	32	28	7	2	25	33	9	4		Rural	11	20	22	11	7	20	32	10		Rural	16	23	16	8	8	25	23	13		Rural
